# Supplementary material
Source: PubMed Central journal article supplement (PMC3343661)
Supplement: cr201238x4.pdf [file cr201238x4.pdf]

## Supplementary Fig. S3

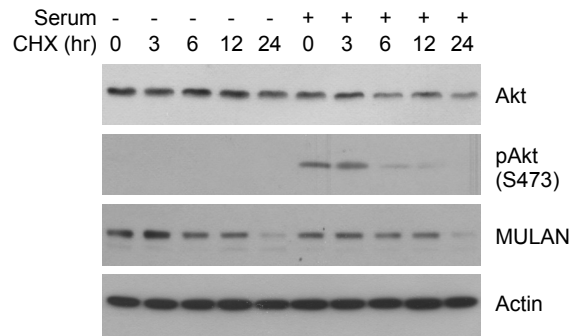

**Supplementary information, Figure S3** Serum decreased Akt protein stability. HeLa cells were serum-starved for 20 h, and one set of the cells was stimulated with 10% fetal bovine serum. The cells were subsequently treated with 40  $\mu\text{g/ml}$  cycloheximide for 0, 3, 6, 12, and 24 h, and endogenous Akt protein stability was investigated using immunoblotting.
