# Supplementary material
Source: PubMed Central journal article supplement (PMC3343661)
Supplement: cr201238x5.pdf [file cr201238x5.pdf]

## Supplementary Fig. S4

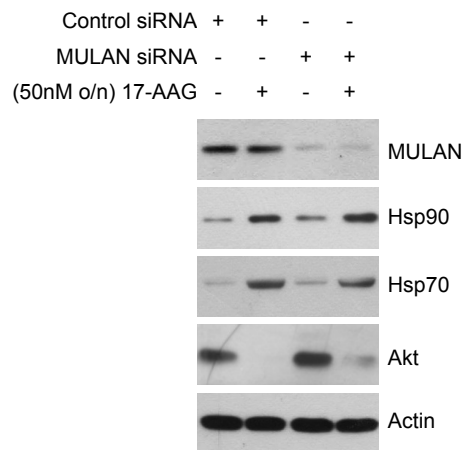

**Supplementary information, Figure S4** Geldanamycin induced Akt degradation in both control cells and MULAN-depleted cells. HeLa cells were transfected with negative control siRNA or MULAN siRNA, and then cells were then treated with geldanamycin (50 nM) overnight. The protein levels of MULAN and Akt were detected by immunoblotting.
