# Supplementary material
Source: PubMed Central journal article supplement (PMC3343661)
Supplement: cr201238x7.pdf [file cr201238x7.pdf]

## Supplementary Fig. S6

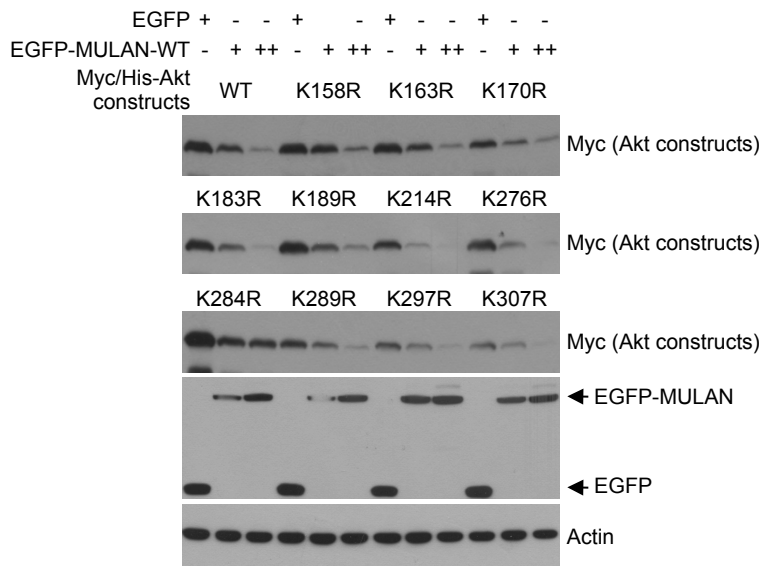

**Supplementary Figure S6** The mutation of lysine 284 prevents the proteolytic degradation of ectopically expressed Akt by MULAN. HEK293 cells were cotransfected with plasmids for wild type or one of the lysine mutants of Akt in combination with the plasmid for EGFP-MULAN or control EGFP. At 24 h after transfection, the cells were lysed and immunoblotted with the indicated antibodies.
