# Supplementary material
Source: PubMed Central journal article supplement (PMC3343661)
Supplement: cr201238x8.pdf [file cr201238x8.pdf]

## Supplementary Fig. S7

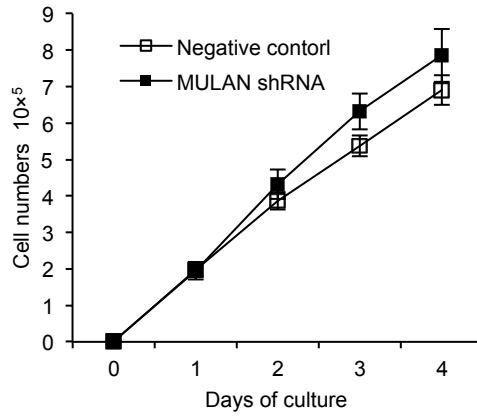

**Supplementary information, Figure S7** The depletion of MULAN in HeLa cells by shRNA increased cell growth. HeLa cells were infected with lentivirus expressing negative control shRNA or MULAN shRNA. The cells were selected with 5  $\mu\text{g/ml}$  puromycin for 2 weeks. The cell growth was determined by counting using a hemocytometer every 24 h. The data represent the mean of three independent experiments (mean  $\pm$  standard error are shown).
