# Supplementary material
Source: PubMed Central journal article supplement (PMC3343661)
Supplement: cr201238x9.pdf [file cr201238x9.pdf]

## Supplementary Fig. S8

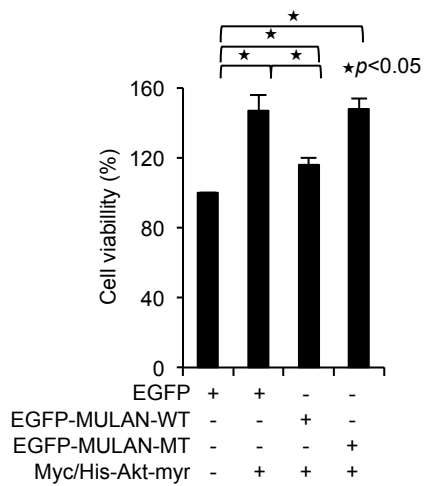

**Supplementary information, Figure S8** Akt-mediated increases in cell viability are reduced by MULAN in a RING domain-dependent manner. HeLa cells were transfected with plasmids for control EGFP, EGFP-tagged wild-type MULAN (EGFP-MULAN-WT) or RING domain mutant MULAN (EGFP-MULAN-MT) in combination with Myc/His-Akt-myr. At 24 h after transfection, the cell viability was determined using an MTS assay. Three independent experiments were performed. The results are representative of three independent experiments (mean  $\pm$  standard error are shown). The Student's t-test was used to determine statistical significance ( $*P < 0.05$ ).
