# Supplementary material
Source: PubMed Central journal article supplement (PMC3343661)
Supplement: cr201238x12.pdf [file cr201238x12.pdf]

**Supplementary information, Table S1.** Primer sequences used to generate constructs for Akt and MULAN.

| Primer             | Sequence <sup>a</sup>                                          |
|--------------------|----------------------------------------------------------------|
| Myc/His-Akt1_5     | GGAATTCC accatggcaatgagcgcacgtgctattg                          |
| Myc/His-Akt1_3     | CCGCTCGAG cgggccgtgccgtggccgag                                 |
| GST-MULAN_5        | GGAATTCC atggagagcggagggcggc                                   |
| GST-MULAN-3        | GGAATTCC ttagctgtgtacaggggtatc                                 |
| EGFP-MULAN_5       | GGAATTCC atggagagcggagggcggc                                   |
| EGFP-MULAN_3       | CGCGGATCCGCG ttagctgtgtacag                                    |
| Akt1-PH_5          | GGAATTCC accatggcaatgagcgcacgtgctattg                          |
| Akt1-PH-3          | CCGCTCGAG cgcacgcgggtgcttgggc                                  |
| Akt1-KD_5          | GGAATTCC accatggcaacctgaacgagtttg                              |
| Akt1-KD_3          | CCGCTCGAG cgaagaagcagatgctgcatg                                |
| Akt1-HM_5          | GGAATTCC accatggcagccggtatcgtgtggc                             |
| Akt1-HM_3          | CCGCTCGAG cgggccgtgccgtggccgag                                 |
| Myc/His-Akt1-myr_5 | GGAATTCC<br>accatggggagcagcaagagcaagcccaagatgagcgcacgtggctattg |
| Akt1-T308A_5       | ggtgccaccatgaaggccttttgcggcacac                                |
| Akt1-T308A_3       | gtgtgccgcaaaaggccttcatggtggcacc                                |
| Akt1-S473A_5       | cacttccccagttcgctactcggccagcg                                  |
| Akt1-S473A_3       | cgctggccgagtaggcgaactgggggaagtg                                |
| MULAN-C302S_5      | tgaagctgctcagacacactacagaggcgtcttcagactctcctg                  |
| MULAN-C302S_3      | caggagagtctgaagagcgcctctgtagtgtctgagcagcttca                   |
| MULAN-C305S-5      | ctaaagagcgcctctgtagtgtctgagcagcttcaagtctgc                     |
| MULAN-C305S-3      | gcaggactgaagctgctcagagacagtacagaggcgtcttca                     |

<sup>a</sup>Uppercase letters represent restriction enzyme sites for cloning.
