# Supplementary material
Source: PubMed Central journal article supplement (PMC3343661)
Supplement: cr201238x13.pdf [file cr201238x13.pdf]

## Supplementary Fig. S9

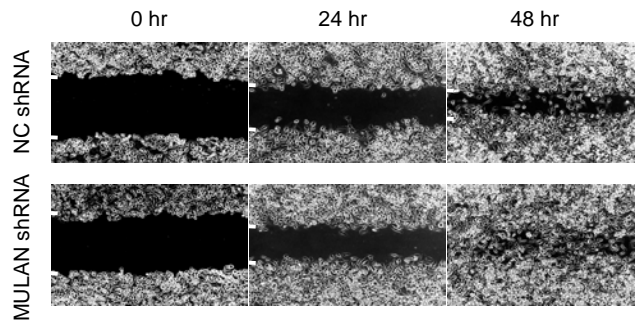

**Supplementary information, Figure S9** Depletion of endogenous MULAN inhibits cell migration. Lentivirus-mediated MULAN-depleted cells and control cells were incubated, and 100% confluent cells were scratched to form a wound. Cell migration was visualized on a phase-contrast microscope at 72 h.
